# Supplementary material
Source: Research Square preprint supplement (doi:10.21203/rs.3.rs-8940480/v1)
Supplement: Supplementary file 1 [file 13bed399c3e7f84533c36bd6.xlsx]

## Sheet: Sheet1
创新型产业集群	Innovative industrial cluster	id	year	Operating revenue	Industrial Cluster Resilience
北 京	Bei jing	1	2018	476465000	0.206458
天 津	Tian jin	2	2018	115228337	0.104106
河 北	He bei	3	2018	234989537	-0.0129495
山 西	Shan xi	4	2018	137507286	-0.0587451
内蒙古	Nei meng gu	5	2018	70102748	-0.0324819
辽 宁	Liao ning	6	2018	171540575	0.0125587
吉 林	Ji lin	7	2018	94068149	0.00748082
黑龙江	Hei long jiang	8	2018	74431479	-0.341551
上 海	Shang hai	9	2018	205549061	-0.00916764
江 苏	Jiang su	10	2018	616197206	0.0210354
浙 江	Zhe jiang	11	2018	229024675	0.0269006
安 徽	An hui	12	2018	165129877	-0.0595821
福 建	Fu jian	13	2018	207278306	-0.106348
江 西	Jiang xi	14	2018	70464537	-0.0416739
山 东	Shan dong	15	2018	375897960	-0.211448
河 南	He nan	16	2018	32180045	-0.0877495
湖 北	Hu bei	17	2018	128089600	0.128772
湖 南	Hu nan	18	2018	201305634	0.0246662
广 东	Guang dong	19	2018	1152941206	0.0392225
广 西	Guang xi	20	2018	202858269	-0.117489
重 庆	Chong qing	21	2018	84434530	-0.0486026
四 川	Si chuan	22	2018	186115517	0.0936282
贵 州	Gui zhou	23	2018	3552826	0.0733207
云 南	Yun nan	24	2018	21377350	0.0516029
陕 西	Shan xi	25	2018	209001918	0.226362
甘 肃	Gan su	26	2018	13988424	-0.00683469
青 海	Qing hai	27	2018	48113699	-0.0491403
新 疆	Xin jiang	28	2018	13508070	-0.139037
北 京	Bei jing	1	2019	451643570	-0.0848489
天 津	Tian jin	2	2019	139141692	0.165805
河 北	He bei	3	2019	245104368	0.00700244
山 西	Shan xi	4	2019	84103325	-0.409506
内蒙古	Nei meng gu	5	2019	70738273	-0.0258016
辽 宁	Liao ning	6	2019	174015403	-0.0206254
吉 林	Ji lin	7	2019	84752826	-0.13016
黑龙江	Hei long jiang	8	2019	85724075	0.111922
上 海	Shang hai	9	2019	206792999	-0.0287113
江 苏	Jiang su	10	2019	665134599	0.0421202
浙 江	Zhe jiang	11	2019	237794092	0.00241321
安 徽	An hui	12	2019	164917945	-0.0357931
福 建	Fu jian	13	2019	136391000	-0.364728
江 西	Jiang xi	14	2019	77173340	0.0573644
山 东	Shan dong	15	2019	390278952	0.00238177
河 南	He nan	16	2019	31914646	-0.0425163
湖 北	Hu bei	17	2019	147191150	0.10942
湖 南	Hu nan	18	2019	209717058	0.00578655
广 东	Guang dong	19	2019	1341332897	0.123201
广 西	Guang xi	20	2019	151735221	-0.27786
重 庆	Chong qing	21	2019	83925015	-0.0403799
四 川	Si chuan	22	2019	229596859	0.190999
贵 州	Gui zhou	23	2019	3654856	-0.00682832
云 南	Yun nan	24	2019	23984597	0.0831948
陕 西	Shan xi	25	2019	232910284	0.0758863
甘 肃	Gan su	26	2019	16214997	0.119119
青 海	Qing hai	27	2019	41223726	-0.172808
新 疆	Xin jiang	28	2019	12562505	-0.102135
北 京	Bei jing	1	2020	531430000	0.0785393
天 津	Tian jin	2	2020	205216849	0.35189
河 北	He bei	3	2020	233365130	-0.127289
山 西	Shan xi	4	2020	83646306	-0.0883685
内蒙古	Nei meng gu	5	2020	75148372	-0.0262424
辽 宁	Liao ning	6	2020	197816219	0.0419813
吉 林	Ji lin	7	2020	65688886	-0.289566
黑龙江	Hei long jiang	8	2020	69626322	-0.255514
上 海	Shang hai	9	2020	217284964	-0.0368818
江 苏	Jiang su	10	2020	735726068	0.0138935
浙 江	Zhe jiang	11	2020	252785286	-0.0256018
安 徽	An hui	12	2020	173040957	-0.03824
福 建	Fu jian	13	2020	143317657	-0.0368372
江 西	Jiang xi	14	2020	81871461	-0.0275865
山 东	Shan dong	15	2020	394725756	-0.0729438
河 南	He nan	16	2020	40560364	0.164924
湖 北	Hu bei	17	2020	133480503	-0.168769
湖 南	Hu nan	18	2020	214571751	-0.0621691
广 东	Guang dong	19	2020	1444898217	-0.0126153
广 西	Guang xi	20	2020	157869307	-0.0463324
重 庆	Chong qing	21	2020	148832596	0.62552
四 川	Si chuan	22	2020	270904844	0.081525
贵 州	Gui zhou	23	2020	3874147	-0.0283909
云 南	Yun nan	24	2020	48546514	0.855288
陕 西	Shan xi	25	2020	265235493	0.0438274
甘 肃	Gan su	26	2020	16355981	-0.075418
青 海	Qing hai	27	2020	43966683	-0.0223978
新 疆	Xin jiang	28	2020	12042505	-0.121329
北 京	Bei jing	1	2021	636851722	-0.135485
天 津	Tian jin	2	2021	287114394	0.00930501
河 北	He bei	3	2021	254195713	-0.214199
山 西	Shan xi	4	2021	233471665	1.01358
内蒙古	Nei meng gu	5	2021	94015263	-0.0974749
辽 宁	Liao ning	6	2021	229728231	-0.162214
吉 林	Ji lin	7	2021	71668376	-0.212925
黑龙江	Hei long jiang	8	2021	72555707	-0.248241
上 海	Shang hai	9	2021	260250930	-0.135942
江 苏	Jiang su	10	2021	981144310	-0.0379509
浙 江	Zhe jiang	11	2021	306340027	-0.125756
安 徽	An hui	12	2021	180220125	-0.248663
福 建	Fu jian	13	2021	204850027	0.031138
江 西	Jiang xi	14	2021	179547206	0.582073
山 东	Shan dong	15	2021	658788910	0.204013
河 南	He nan	16	2021	82865853	0.473853
湖 北	Hu bei	17	2021	261642518	0.41407
湖 南	Hu nan	18	2021	370076115	0.244225
广 东	Guang dong	19	2021	1906647949	-0.0480509
广 西	Guang xi	20	2021	180187514	-0.176606
重 庆	Chong qing	21	2021	246184636	0.193283
四 川	Si chuan	22	2021	389594612	0.0374726
贵 州	Gui zhou	23	2021	7071732	0.316831
云 南	Yun nan	24	2021	64147307	-0.0467631
陕 西	Shan xi	25	2021	374972318	0.0198776
甘 肃	Gan su	26	2021	16500999	-0.272197
青 海	Qing hai	27	2021	63286509	0.0384077
新 疆	Xin jiang	28	2021	66099523	2.9597
北 京	Bei jing	1	2022	690084179	-0.320457
天 津	Tian jin	2	2022	574283124	0.254367
河 北	He bei	3	2022	507239377	0.251406
山 西	Shan xi	4	2022	278212391	-0.252699
内蒙古	Nei meng gu	5	2022	103401582	-0.310265
辽 宁	Liao ning	6	2022	316992334	-0.134658
吉 林	Ji lin	7	2022	101473607	-0.112069
黑龙江	Hei long jiang	8	2022	142519511	0.231846
上 海	Shang hai	9	2022	380782161	-0.0824329
江 苏	Jiang su	10	2022	1289925386	-0.17551
浙 江	Zhe jiang	11	2022	682797839	0.39779
安 徽	An hui	12	2022	368442521	0.282094
福 建	Fu jian	13	2022	213683999	-0.345832
江 西	Jiang xi	14	2022	365245803	0.275734
山 东	Shan dong	15	2022	639152113	-0.391569
河 南	He nan	16	2022	229783378	0.738988
湖 北	Hu bei	17	2022	583360595	0.398242
湖 南	Hu nan	18	2022	582159366	-0.0134835
广 东	Guang dong	19	2022	3619498823	0.190506
广 西	Guang xi	20	2022	187360385	-0.347911
重 庆	Chong qing	21	2022	546783973	0.392863
四 川	Si chuan	22	2022	524744138	-0.155328
贵 州	Gui zhou	23	2022	6982483	-0.380791
云 南	Yun nan	24	2022	73367827	-0.282733
陕 西	Shan xi	25	2022	558213046	-0.0664141
甘 肃	Gan su	26	2022	40589797	0.542624
青 海	Qing hai	27	2022	129306218	0.281332
新 疆	Xin jiang	28	2022	104606242	-0.00754052
