# Supplementary material
Source: Research Square preprint supplement (doi:10.21203/rs.3.rs-8940480/v1)
Supplement: Supplementary file 1 [file 850e576dcb11245810ced48a.docx]

Due to concerns that the data might still not open, the data is uploaded again in this section.
