# Supplementary material
Source: Research Square preprint supplement (doi:10.21203/rs.3.rs-8940480/v1)
Supplement: Supplementary file 3 [file ae33f50eeb920cd8d2d42d1e.xlsx]

## Sheet: Sheet1
创新型产业集群	Innovative industrial cluster	id	year	Industrial Cluster Resilience	Digital technology	Fundamentals of Digital Technology	Application of Digital Technology	Digital technology innovation	Technology Spillover Effect	Regional scale effect	Financial service institutions	National Technology Transfer Institutions (individual)	Number of Industry Alliance Organizations	Per capita regional GDP (yuan/person)	Local government general budget expenditure (100 million yuan)	Number of Students Enrolled in Regular Higher Education Institutions (ten thousand)	Total Import and Export Volume of the Retail and Wholesale Industries	Software Business Exports (ten thousand USD)	Value Added of Secondary Industry (100 million yuan)	Urban Employment in Scientific Research and Technical Services (ten thousand people)	Number of domestic patent applications granted	Urbanization rate (urban population (ten thousand) / year-end permanent population (ten thousand))	Property Rights Structure (PRS) (State-owned shares controlling industrial enterprise profits / total profits of industrial enterprises above designated size)	Total Investment of Foreign-Invested Enterprises (Million USD)
北 京	Bei jing	1	2018	0.206458	0.104579	0.0285455	0.0295895	0.0464444	600.433	201709	13	0	13	150962	7471.43	59.49	12048.9	382497	5477.4	71.7	123496	0.870894	0.572288	547718
天 津	Tian jin	2	2018	0.104106	0.0397083	0.0129114	0.0107	0.0160969	651.449	81688	50	2	9	95689	3103.16	52.33	2136.4	26415	4835.3	10.8	54680	0.839479	0.56009	290620
河 北	He bei	3	2018	-0.0129495	0.0655591	0.0262522	0.0231163	0.0161906	724.144	146067	100	5	11	43808	7726.21	134.26	237.4	3800	12904.1	15.9	51894	0.573256	0.169101	108665
山 西	Shan xi	4	2018	-0.0587451	0.0176606	0.00398638	0.0110162	0.00265804	1480.6	35110	42	0	15	45517	4283.91	76.56	107.8	180	7074.5	7.3	15060	0.598515	0.451361	63011
内蒙古	Nei meng gu	5	2018	-0.0324819	0.0141172	0.00256781	0.00728373	0.00426568	1967.59	33862	12	2	4	66491	4831.46	45.53	300.1	236	6335.4	5.6	9625	0.655244	0.418973	44853
辽 宁	Liao ning	6	2018	0.0125587	0.106811	0.029236	0.0522605	0.0253147	147.681	279752	117	5	44	54657	5337.72	96.32	751.5	259863	9049	10.4	35149	0.702633	0.364309	377494
吉 林	Ji lin	7	2018	0.00748082	0.0482424	0.00972563	0.0132716	0.0252451	164.587	31900	84	8	1	44925	3789.59	65.83	24.3	4609	4051.5	7.3	13885	0.608696	0.548225	49009
黑龙江	Hei long jiang	8	2018	-0.341551	0.0213639	0.00425497	0.0146172	0.00249179	206.066	55930	9	0	3	38199	4676.75	73.21	1076.8	70	3536	9.2	19435	0.634506	0.441889	42747
上 海	Shang hai	9	2018	-0.00916764	0.119452	0.0341099	0.0580281	0.027314	241.867	190698	5	0	14	145767	8351.54	51.78	17513.2	390859	10360.8	26.9	92460	0.891313	0.528786	884911
江 苏	Jiang su	10	2018	0.0210354	0.124506	0.0477619	0.026048	0.0506962	440.889	447570	235	7	27	110508	11657.4	180.63	6527.6	583171	42129.4	21.8	306996	0.711935	0.156278	1056042
浙 江	Zhe jiang	11	2018	0.0269006	0.0967061	0.0375322	0.0291647	0.0300092	565.29	179228	313	8	8	93230	8629.53	101.94	8051.6	314115	25308.1	16.6	284621	0.700143	0.180679	445788
安 徽	An hui	12	2018	-0.0595821	0.0550414	0.0213581	0.00854211	0.0251411	629.216	144961	25	4	7	56063	6572.15	113.91	816.6	8442	14094.4	9.3	79747	0.556452	0.259129	112984
福 建	Fu jian	13	2018	-0.106348	0.0485882	0.025804	0.0102389	0.0125453	661.282	240328	22	1	14	94719	4832.69	77.24	4179	47175	18847.8	7.7	102622	0.669834	0.106471	278698
江 西	Jiang xi	14	2018	-0.0416739	0.0305023	0.0117097	0.00523536	0.0135572	273.597	56371	51	1	4	50347	5667.52	105.44	167.4	7384	10081.2	6.1	52819	0.573454	0.153304	87720
山 东	Shan dong	15	2018	-0.211448	0.116739	0.0449017	0.0221518	0.0496859	425.509	306070	161	11	32	66284	10101	204.08	2002.6	70953	27523.7	17.3	132382	0.614568	0.279463	345229
河 南	He nan	16	2018	-0.0877495	0.0172719	0.00607483	9.23436e-05	0.0111048	64.6086	55952	32	1	2	50714	9217.73	214.08	264.7	487	22038.6	14	82318	0.522405	0.0772254	105408
湖 北	Hu bei	17	2018	0.128772	0.0551984	0.0207508	0.0214311	0.0130166	29.4606	157023	87	1	15	71097	7258.27	143.82	482.9	25115	17573.9	15.8	64106	0.609937	0.313022	142275
湖 南	Hu nan	18	2018	0.0246662	0.0620624	0.0266118	0.0151383	0.0203123	35.9442	120149	52	5	3	54763	7479.61	132.68	253.7	14470	13904.1	11.2	48957	0.560965	0.229428	183185
广 东	Guang dong	19	2018	0.0392225	0.331138	0.115122	0.0995053	0.116511	92.78	778239	243	20	20	81625	15729.3	196.32	10425.3	2673335	41398.5	37.8	478082	0.718092	0.184579	1923465
广 西	Guang xi	20	2018	-0.117489	0.0330897	0.0126682	0.00912731	0.0112942	114.278	97534	14	3	12	39837	5310.74	94.22	297.8	2502	6692.9	7.1	20551	0.518294	0.370512	62723
重 庆	Chong qing	21	2018	-0.0486026	0.0289717	0.0111909	0.0123167	0.00546414	17.417	64583	34	4	4	68460	4540.95	76.28	736.5	15828	8842.2	8.2	45688	0.66614	0.14056	110686
四 川	Si chuan	22	2018	0.0936282	0.0667808	0.0214409	0.0179506	0.0273893	18.0328	185325	95	10	9	51658	9707.5	156.47	432.7	152418	16056.9	20.4	87372	0.535032	0.301188	125557
贵 州	Gui zhou	23	2018	0.0733207	0.00674055	0.0023836	0.00027185	0.0040851	19.0004	7652	24	1	4	40271	5029.68	68.75	129.5	1739	5506.2	6.7	19456	0.49529	0.687216	45303
云 南	Yun nan	24	2018	0.0516029	0.0115716	0.00190399	0.00635353	0.00331411	21.4927	12648	79	1	4	44446	6075.03	76.47	525.2	101	7267.5	9.9	20340	0.474378	0.5869	54369
陕 西	Shan xi	25	2018	0.226362	0.0833277	0.0280259	0.0182773	0.0370245	21.9325	141060	152	9	15	61115	5302.44	105.48	1467.2	120449	11215.3	17	41479	0.59654	0.533103	118786
甘 肃	Gan su	26	2018	-0.00683469	0.00643131	0.000466522	0.00161819	0.0043466	191.014	12830	0	0	0	32178	3772.23	48.36	55.2	519	2761.6	6.5	13958	0.497018	0.622781	23617
青 海	Qing hai	27	2018	-0.0491403	0.0122219	0.0034976	0.0013314	0.00739285	205.543	77218	19	0	9	46854	1647.43	7.03	7	88	1093.7	2.2	2668	0.572402	0.339713	7874
新 疆	Xin jiang	28	2018	-0.139037	0.00919026	0.000328525	0.0041544	0.00470734	272.396	10245	2	0	1	51238	5012.45	37.49	272.3	279	4657.2	6.5	9658	0.540079	0.631973	21151
北 京	Bei jing	1	2019	-0.0848489	0.114249	0.0282399	0.0344073	0.0516023	345.852	131162	8	0	12	161776	7408.19	60.15	12601.6	547818	5667.4	68.9	131716	0.873516	0.55655	599561
天 津	Tian jin	2	2019	0.165805	0.0367875	0.0124739	0.00809365	0.0162199	482.504	75522	47	2	9	101557	3555.71	53.94	1798.8	22354	4947.2	11.1	57799	0.843321	0.110277	310544
河 北	He bei	3	2019	0.00700244	0.0693614	0.0276154	0.0226676	0.0190784	11.1005	155294	106	4	11	47036	8309.04	147.4	344.8	4895	13393.7	16.4	57809	0.587753	0.143535	158991
山 西	Shan xi	4	2019	-0.409506	0.0176387	0.00531391	0.00716603	0.00515876	14.2386	34413	42	0	15	48469	4710.76	80.2	106.6	65	7466.3	7.7	16598	0.612811	0.477054	70136
内蒙古	Nei meng gu	5	2019	-0.0258016	0.0149313	0.00274511	0.00791729	0.00426895	20.1636	34731	12	2	4	71170	5100.91	47.2	411.1	253	6763.1	7	11059	0.664596	0.39712	58421
辽 宁	Liao ning	6	2019	-0.0206254	0.118219	0.0304559	0.0617367	0.0260266	22.8099	295290	174	5	44	58019	5745.09	104.11	1035.2	244314	9475.9	9.8	40037	0.712181	0.219765	402830
吉 林	Ji lin	7	2019	-0.13016	0.0478687	0.0115448	0.0153226	0.0210013	34.2382	43687	64	8	1	47554	3933.42	70.01	54.7	7255	4134.8	7.8	15579	0.616422	0.620304	64297
黑龙江	Hei long jiang	8	2019	0.111922	0.0170055	0.00394745	0.0105892	0.0024689	15.5431	61698	9	0	3	41156	5011.56	77.82	1129	1076	3640.1	8.6	19989	0.646083	0.29234	46046
上 海	Shang hai	9	2019	-0.0287113	0.114343	0.0349926	0.0516696	0.0276813	15.2247	187559	5	0	14	153299	8179.28	52.66	17877.8	497568	10193.6	36.2	100587	0.892382	0.456986	955229
江 苏	Jiang su	10	2019	0.0421202	0.142966	0.0529007	0.0326758	0.0573899	34.4694	449084	256	7	28	116650	12573.5	187.41	7667.6	938531	43507.5	27.3	314395	0.724643	0.152204	1173515
浙 江	Zhe jiang	11	2019	0.00241321	0.109159	0.0395878	0.0363365	0.0332351	29.4343	185735	317	8	9	98770	10053	107.47	8716.6	562270	26299.5	18	285342	0.715765	0.165156	500693
安 徽	An hui	12	2019	-0.0357931	0.0623091	0.0220564	0.0152019	0.0250508	53.0574	152003	27	4	7	60561	7392.22	124.12	1055.5	14486	14970	10.6	82524	0.570256	0.280956	165643
福 建	Fu jian	13	2019	-0.364728	0.0433336	0.0170391	0.01264	0.0136545	290.525	206784	19	1	7	102722	5077.93	86.12	4917.6	92873	20065.5	7.9	98955	0.678753	0.0817998	297471
江 西	Jiang xi	14	2019	0.0573644	0.0312488	0.0130269	0.00359825	0.0146237	245.242	61645	57	1	4	54640	6386.8	113.5	292.5	8321	10820.3	6.4	59140	0.590788	0.127797	100985
山 东	Shan dong	15	2019	0.00238177	0.1259	0.0492545	0.0226874	0.0539582	277.129	331365	168	11	30	69901	10739.8	218.39	2559.7	140001	28171.8	18.2	146481	0.618642	0.313915	575432
河 南	He nan	16	2019	-0.0425163	0.0175086	0.00631033	9.62708e-05	0.011102	369.517	54897	32	1	2	54356	10163.9	231.97	462.8	163	23035.6	17.6	86247	0.540147	0.0851072	116307
湖 北	Hu bei	17	2019	0.10942	0.0589523	0.0228151	0.0227895	0.0133477	503.138	164770	89	1	15	76712	7970.21	150.08	274	36866	18723	17	73940	0.618357	0.281027	186438
湖 南	Hu nan	18	2019	0.00578655	0.0634452	0.0277145	0.0152938	0.020437	487.185	126417	62	5	3	60104	8034.42	140.71	435.3	10516	15401.7	13.4	54685	0.574548	0.188073	184126
广 东	Guang dong	19	2019	0.123201	0.403004	0.133254	0.128318	0.141431	653.086	831263	267	18	20	86956	17297.8	205.4	10688.8	2303426	43368.2	47.3	527390	0.726479	0.146957	1953252
广 西	Guang xi	20	2019	-0.27786	0.0311545	0.0125405	0.00716376	0.0114502	680.504	74555	15	3	12	42778	5850.96	107.64	449.3	1878	7046.4	7.4	22687	0.529707	0.329375	91640
重 庆	Chong qing	21	2019	-0.0403799	0.0347062	0.0142406	0.0134674	0.00699823	1039.85	66981	34	3	5	74337	4847.68	83.49	805.6	18709	9392	7.6	43872	0.682246	0.109376	111070
四 川	Si chuan	22	2019	0.190999	0.0973398	0.024099	0.0414357	0.0318051	1668.3	207027	96	10	9	55619	10348.2	166.17	452.1	160611	17187.9	15.3	82066	0.553586	0.316254	289060
贵 州	Gui zhou	23	2019	-0.00682832	0.00703042	0.00262891	0.000306249	0.00409526	330.41	7756	29	1	4	43727	5948.74	76.57	156	2177	5971.5	4.8	24729	0.514813	0.733678	48722
云 南	Yun nan	24	2019	0.0831948	0.00676857	0.00202578	0.00129275	0.00345004	417.981	11462	79	1	4	49323	6770.09	86.4	749.8	3	8060.4	9.4	22324	0.486636	0.536685	67099
陕 西	Shan xi	25	2019	0.0758863	0.0835953	0.0307813	0.0142951	0.0385189	712.674	151762	159	9	16	65506	5718.52	112.2	1441.1	71925	11779.5	12.9	44101	0.61283	0.568076	121290
甘 肃	Gan su	26	2019	0.119119	0.00630416	0.00042897	0.00147674	0.00439844	953.374	11791	0	0	0	34707	3951.6	52.49	54.5	519	2862.4	6.6	14894	0.506975	0.716305	25617
青 海	Qing hai	27	2019	-0.172808	0.00884774	0.00354572	0.00225145	0.00305057	2422.09	70462	21	0	5	49976	1863.67	7.32	20.1	90	1153.9	1.8	3046	0.588136	1.03967	7834
新 疆	Xin jiang	28	2019	-0.102135	0.00495925	0.000308238	1.49137e-05	0.0046361	248.985	6499	2	0	1	53542	5315.49	42.7	1941.1	279	4784.4	6.6	8652	0.555295	0.527836	24123
北 京	Bei jing	1	2020	0.0785393	0.12471	0.0335055	0.0325132	0.0586911	246.314	138934	9	0	13	164158	7116.18	60.89	12499.2	582670	5739.1	58.2	162824	0.875286	0.50745	646907
天 津	Tian jin	2	2020	0.35189	0.0620693	0.0158715	0.0244437	0.0217542	253.993	93833	48	2	12	101068	3151.35	57.22	1780.6	25793	4911.8	11.4	75434	0.847152	0.0420635	306423
河 北	He bei	3	2020	-0.127289	0.0736606	0.0285651	0.0231645	0.021931	279.158	163773	105	4	14	48302	9022.79	160.48	279.5	14378	13765.1	15.7	92196	0.60075	0.140988	225402
山 西	Shan xi	4	2020	-0.0883685	0.0143596	0.0051968	0.00394605	0.00521678	444.633	33613	35	0	13	51051	5110.87	84.2	144	180	7703.2	7.9	27296	0.625215	0.469621	92559
内蒙古	Nei meng gu	5	2020	-0.0262424	0.0151691	0.00233568	0.00855131	0.00428215	91.2685	36942	12	1	4	71640	5270.16	48.66	328.6	215	6908.2	6.3	17958	0.67499	0.413406	56084
辽 宁	Liao ning	6	2020	0.0419813	0.146121	0.0411236	0.0772063	0.0277914	68.9853	298299	217	9	107	58629	6014.17	114.08	821.4	259583	9357.5	10.5	60185	0.721504	0.147202	415731
吉 林	Ji lin	7	2020	-0.289566	0.0362169	0.0103097	0.0142855	0.0116216	90.3936	44405	59	8	1	50561	4127.17	72.7	46.6	9334	4319.9	7.3	23951	0.626511	0.469207	70774
黑龙江	Hei long jiang	8	2020	-0.255514	0.0130684	0.00425369	0.00463662	0.00417806	149.086	59613	9	0	3	42432	5449.41	82.56	845.9	329	3449.9	5.6	28475	0.655944	-0.197862	168558
上 海	Shang hai	9	2020	-0.0368818	0.105092	0.0271731	0.0526258	0.0252925	181.122	189520	4	0	14	156803	8102.11	54.07	19721.8	451183	10258.6	32.1	139780	0.893087	0.335671	1033395
江 苏	Jiang su	10	2020	0.0138935	0.151356	0.0565405	0.0304534	0.0643626	60.7909	462719	258	7	31	121333	13681.5	201.47	8551	1489684	44631.3	26.6	499167	0.734458	0.134918	1369729
浙 江	Zhe jiang	11	2020	-0.0256018	0.212562	0.041442	0.133631	0.0374885	63.3061	194251	316	8	9	100738	10082	114.87	9774.7	451717	26361.5	19.6	391700	0.721707	0.129274	589264
安 徽	An hui	12	2020	-0.03824	0.0603425	0.0236337	0.0152606	0.0214482	76.2012	164205	34	4	8	62411	7473.59	136.85	1184.9	17547	15216.5	11.1	119696	0.583292	0.301465	322704
福 建	Fu jian	13	2020	-0.0368372	0.0465155	0.0200433	0.0133842	0.013088	94.7998	205246	19	2	6	105106	5216.1	94.72	5131.5	89731	20168.4	8.4	145928	0.687575	0.0913802	315255
江 西	Jiang xi	14	2020	-0.0275865	0.0337833	0.012901	0.00595135	0.0149309	215.425	60571	61	1	4	57065	6674.08	124.2	354.9	7778	11107.9	7.1	80239	0.604337	0.120362	133086
山 东	Shan dong	15	2020	-0.0729438	0.109139	0.0525256	0.0163213	0.040292	208.028	306908	181	10	31	71825	11233.5	229.15	3080.8	91687	28456.7	20.5	238778	0.630497	0.212964	1207308
河 南	He nan	16	2020	0.164924	0.0299665	0.0077645	0.00396985	0.0182321	221.997	61115	21	3	2	54691	10372.7	249.22	343.9	6661	22220.9	18.4	122809	0.55427	0.119047	111920
湖 北	Hu bei	17	2020	-0.168769	0.0660501	0.0214817	0.028773	0.0157953	234.193	180310	89	2	15	73687	8442.88	161.69	512.6	27008	15933.8	17.1	110102	0.628895	0.276059	237071
湖 南	Hu nan	18	2020	-0.0621691	0.0670881	0.02916	0.017132	0.020796	525.816	129853	61	3	3	62537	8403.13	151.03	443.4	34000	15949.2	13.3	78723	0.58766	0.150559	214906
广 东	Guang dong	19	2020	-0.0126153	0.485437	0.155695	0.16238	0.167362	580.031	841105	314	16	20	88521	17430.8	240.02	10448.2	2272393	43868.1	47.8	709725	0.741524	0.130608	2167181
广 西	Guang xi	20	2020	-0.0463324	0.03893	0.0131187	0.0119088	0.0139024	89.0627	75346	15	2	12	44237	6179.47	118.42	435.3	1490	7046.8	8.6	34470	0.541941	0.341538	289389
重 庆	Chong qing	21	2020	0.62552	0.0236475	0.015179	0.00243654	0.00603193	97.3304	82874	33	3	6	78294	4893.95	91.56	599.3	23441	9969.6	7.7	55377	0.694609	0.171062	123895
四 川	Si chuan	22	2020	0.081525	0.110476	0.025661	0.0486341	0.0361807	180.709	215180	94	9	9	58009	11198.5	180.09	383.2	253450	17505.6	20.4	108386	0.567316	0.337591	296279
贵 州	Gui zhou	23	2020	-0.0283909	0.00859385	0.00287998	0.00031478	0.00539909	299.189	7523	30	0	4	46355	5739.5	84.02	137.4	2891	6263	5.5	34971	0.531623	0.760986	83573
云 南	Yun nan	24	2020	0.855288	0.0106776	0.00268795	0.00416212	0.00382751	162.771	25032	76	1	4	52047	6974.02	96.42	683.6	0	8387.5	9.6	28943	0.500424	0.526457	142431
陕 西	Shan xi	25	2020	0.0438274	0.139107	0.0326191	0.0690843	0.0374036	116.695	180181	164	11	28	65867	5930.32	121	1483	86816	11222	13.5	60524	0.626549	0.493498	183272
甘 肃	Gan su	26	2020	-0.075418	0.00680996	0.000509497	0.000579378	0.00572108	126.372	12386	0	0	0	35848	4163.4	58.11	52.3	519	2824.8	7.3	20991	0.522191	0.737253	25931
青 海	Qing hai	27	2020	-0.0223978	0.0106884	0.00388946	0.00232727	0.00447166	130.039	37960	21	0	5	50845	1932.84	7.41	18.6	89	1143.2	2	4693	0.600337	0.744524	7819
新 疆	Xin jiang	28	2020	-0.121329	0.00383318	0.000445251	1.65864e-05	0.00337134	180.581	6507	2	0	1	53606	5533.16	48.67	1112.9	279	4786.7	6.7	12763	0.565251	0.42296	32042
北 京	Bei jing	1	2021	-0.135485	0.108785	0.0385255	0.0385798	0.0316799	402.252	152569	9	0	13	187526	7205.12	61.7	15343	711272	7389	61.2	198778	0.875286	0.432967	717200
天 津	Tian jin	2	2021	0.00930501	0.0658017	0.0289009	0.0183501	0.0185508	195.614	145379	95	3	23	113660	3152.55	58.34	1843.6	20120	5672.7	11.6	97910	0.848507	0.123877	1021700
河 北	He bei	3	2021	-0.214199	0.0776285	0.0310676	0.0222009	0.02436	216.767	166989	150	3	17	54181	8848.21	170.43	335.7	10480	16355.8	15.6	120034	0.611439	0.144864	235400
山 西	Shan xi	4	2021	1.01358	0.0271802	0.00827731	0.00512873	0.0137741	249.765	85810	68	2	4	65625	5046.62	89.08	253.9	180	11578.1	7.6	37379	0.634195	0.50056	89000
内蒙古	Nei meng gu	5	2021	-0.0974749	0.0157976	0.00242634	0.00918697	0.00418427	226.977	37313	12	1	4	88137	5239.57	50.68	325.1	197	9880.6	5.9	24362	0.682083	0.398471	60600
辽 宁	Liao ning	6	2021	-0.162214	0.163233	0.0485331	0.0852433	0.0294566	385.624	307695	250	9	181	64992	5879.21	117.84	1011.3	272359	10883.3	10.7	80191	0.728068	0.313052	460300
吉 林	Ji lin	7	2021	-0.212925	0.028652	0.0120489	0.0158749	0.000728135	1881.26	49566	64	8	6	55148	3696.84	75.56	99.2	11222	4768.3	6.9	29879	0.633684	0.676211	143800
黑龙江	Hei long jiang	8	2021	-0.248241	0.0118023	0.00417486	0.0041545	0.00347289	1776.07	54756	8	0	3	47199	5104.81	87.91	1358.3	215	4086.5	6	38884	0.65696	0.30368	173400
上 海	Shang hai	9	2021	-0.135942	0.143987	0.026824	0.0994528	0.0177104	2072.88	81513	85	3	25	175420	8430.86	54.87	25032.3	520589	11366.7	35.8	179317	0.89313	0.340811	1215500
江 苏	Jiang su	10	2021	-0.0379509	0.195742	0.0726439	0.045346	0.0777522	2907.32	542849	404	12	38	138255	14585.3	211.08	9892.3	1099188	52678.7	27.2	640917	0.739447	0.152261	1430900
浙 江	Zhe jiang	11	2021	-0.125756	0.141617	0.0492575	0.0470432	0.0453161	6611.35	213639	336	10	9	113839	11014.6	121.03	11894.6	343875	31174	21.7	465468	0.726606	0.10775	667300
安 徽	An hui	12	2021	-0.248663	0.0564791	0.0258972	0.0143988	0.0161832	39.7226	173345	39	5	10	69676	7591.05	150.5	1293.6	30955	17240.1	10.7	153475	0.59398	0.296688	324800
福 建	Fu jian	13	2021	0.031138	0.057948	0.0228323	0.0145768	0.0205389	50.698	217085	55	6	7	118750	5204.72	102.34	7222	97684	23319.8	8.3	153814	0.696919	0.116038	337200
江 西	Jiang xi	14	2021	0.582073	0.0429396	0.0176459	0.010534	0.0147597	53.0294	105834	93	0	10	66020	6778.87	134.87	386.4	9187	13230.7	7.1	97372	0.614567	0.126175	151800
山 东	Shan dong	15	2021	0.204013	0.175748	0.0705238	0.0520869	0.0531375	63.191	461182	264	13	35	81510	11713.2	242.99	4211.5	136842	32834.5	22.6	329838	0.63943	0.267497	1632800
河 南	He nan	16	2021	0.473853	0.0562401	0.0148209	0.0175677	0.0238515	64.7087	84318	29	3	3	58587	9784.29	268.64	455.4	6987	23566.4	18.4	158038	0.564505	0.1059	105200
湖 北	Hu bei	17	2021	0.41407	0.099971	0.0372991	0.039574	0.023098	77.3169	279036	118	3	18	86551	7933.67	169.97	508.3	31442	19332.1	17.3	155169	0.640823	0.255088	232700
湖 南	Hu nan	18	2021	0.244225	0.0616481	0.0221859	0.0211877	0.0182745	84.2399	193082	96	1	5	68913	8325.5	159.61	643.4	54727	17852.5	13.4	98936	0.597101	0.207725	235700
广 东	Guang dong	19	2021	-0.0480509	0.630243	0.183822	0.238656	0.207765	94.073	79776	408	16	28	98561	18247	253.98	13019.3	2598703	50555.8	51.5	872209	0.746295	0.148641	2328500
广 西	Guang xi	20	2021	-0.176606	0.0452814	0.0127934	0.0168902	0.0155978	82.5857	87553	30	2	2	50137	5806.54	132.1	619.7	1213	8513.9	8.8	46804	0.550725	0.360774	900600
重 庆	Chong qing	21	2021	0.193283	0.0473823	0.0291229	0.0116581	0.00660136	224.905	127293	39	3	5	87450	4835.06	100.27	909	28734	11217.3	8.2	76206	0.7033	0.245657	133500
四 川	Si chuan	22	2021	0.0374726	0.147327	0.0311083	0.0726466	0.0435719	76.2734	282493	121	10	6	64610	11215.7	192.08	550.8	120069	19949.7	22.5	146936	0.578237	0.329598	238600
贵 州	Gui zhou	23	2021	0.316831	0.00951781	0.00342948	0.000675566	0.00541277	157.265	12983	34	0	5	50476	5590.01	88.16	130.2	4660	6850.5	5.5	39267	0.543354	0.627309	94600
云 南	Yun nan	24	2021	-0.0467631	0.0148489	0.00472894	0.00353445	0.00658555	200.176	33098	79	2	6	57717	6634.36	104.41	781.2	0	9537.2	9.6	41167	0.510448	0.555957	164100
陕 西	Shan xi	25	2021	0.0198776	0.141167	0.0357962	0.062712	0.0426588	394.135	237645	234	12	42	76171	6069.22	128.33	890.4	187660	14019	13.5	86272	0.636318	0.536082	195500
甘 肃	Gan su	26	2021	-0.272197	0.00629493	0.000511527	0.000580401	0.005203	504.27	12411	0	0	0	40976	4032.56	61.34	56.3	519	3451.2	7.6	26056	0.533333	0.764693	41800
青 海	Qing hai	27	2021	0.0384077	0.00952914	0.00323065	0.0019094	0.00438908	1.41305	36408	10	0	5	57036	1854.52	7.71	29.7	89	1364.7	2.1	6591	0.609428	0.671321	10200
新 疆	Xin jiang	28	2021	2.9597	0.0138408	0.0020257	0.00475409	0.00706101	1.52175	17624	9	4	4	62991	5376.91	55.56	1267.9	279	6295.9	7	21178	0.572422	0.442419	56800
北 京	Bei jing	1	2022	-0.320457	0.115923	0.0382934	0.0453169	0.0323127	1.5761	158328	14	0	14	190313	7469.15	62.66	14772.8	856066	6605.1	62.4	202722	0.875916	0.514569	754000
天 津	Tian jin	2	2022	0.254367	0.114741	0.0368821	0.0429158	0.0349429	2.63589	225904	207	4	31	119235	2729.83	59.45	1808.1	24269	6038.9	11.1	71545	0.851064	0.133885	305700
河 北	He bei	3	2022	0.251406	0.121377	0.0513741	0.0359599	0.0340431	2.96198	288008	81	3	18	56995	9305.64	177.37	339.4	5421	17050.1	14.3	115314	0.616577	0.220645	266700
山 西	Shan xi	4	2022	-0.252699	0.0318237	0.00886396	0.00898337	0.0139764	11.6449	95126	68	2	4	73675	5876.5	94.57	279.5	180	13840.8	7.5	33068	0.639471	0.639109	61700
内蒙古	Nei meng gu	5	2022	-0.310265	0.0157238	0.00232517	0.00918625	0.00421241	13.5508	38552	12	1	4	96474	5887.7	53.45	388	189	11241.8	5.6	24640	0.685964	0.405972	50600
辽 宁	Liao ning	6	2022	-0.134658	0.216863	0.0788081	0.0984947	0.0395601	18.2423	363629	263	10	283	68775	6261.43	118.02	905.5	284065	11755.8	10.1	77434	0.730045	0.297319	517100
吉 林	Ji lin	7	2022	-0.112069	0.0543938	0.015566	0.0138011	0.0250267	39.7938	75588	98	13	6	55347	4044.01	78.87	75.9	17684	4628.3	6.3	29534	0.637138	0.70637	126400
黑龙江	Hei long jiang	8	2022	0.231846	0.0264755	0.00899363	0.007784	0.00969784	25.5518	75278	29	0	3	51096	5451.99	91.2	1558.6	2185	4648.9	5.7	36551	0.662149	0.568132	179800
上 海	Shang hai	9	2022	-0.0824329	0.120858	0.0442686	0.0449102	0.0316789	98.1563	311234	104	3	30	179907	9393	55.48	26108.8	562601	11458.4	38.4	178323	0.893333	0.251514	1255900
江 苏	Jiang su	10	2022	-0.17551	0.319487	0.114573	0.0725392	0.132375	109.269	698193	1223	14	54	144390	14901.4	221.91	10026.2	1112716	55888.7	28.1	560127	0.744216	0.123705	1491600
浙 江	Zhe jiang	11	2022	0.39779	0.252744	0.0718546	0.102252	0.0786373	142.514	383372	403	1	12	118496	12017.8	125.33	13820.8	424803	33205.2	22.7	443985	0.733769	0.10876	706900
安 徽	An hui	12	2022	0.282094	0.110964	0.0323479	0.0422068	0.0364095	177.022	275288	72	6	11	73603	8379.78	155.35	1159	57363	18588	11.7	156584	0.601599	0.275128	338700
福 建	Fu jian	13	2022	-0.345832	0.0645715	0.0225176	0.0201258	0.0219281	928.522	217177	71	6	7	126829	5691.22	107.61	6981.3	78772	25078.2	8	141536	0.701289	0.0757033	394000
江 西	Jiang xi	14	2022	0.275734	0.0786478	0.0292145	0.0173217	0.0321116	7.81195	201909	197	4	11	70923	7289.07	146.44	408.5	16156	14359.6	7.4	75830	0.620804	0.111089	161200
山 东	Shan dong	15	2022	-0.391569	0.215472	0.0727639	0.0773945	0.0653132	7.86756	502048	284	13	34	86003	12128.6	252.71	5241	74154	35014.2	23.1	342290	0.64538	0.335116	2551700
河 南	He nan	16	2022	0.738988	0.0856802	0.0278124	0.0263129	0.0315549	8.25676	154350	85	3	9	62106	10646.8	282.33	562	10656	25465	18	135990	0.570604	0.199332	103000
湖 北	Hu bei	17	2022	0.398242	0.204056	0.0737028	0.0687393	0.0616138	8.34017	441226	220	1	21	92059	8623.87	177.26	767.2	36018	21240.6	17.5	160849	0.646646	0.271567	252800
湖 南	Hu nan	18	2022	-0.0134835	0.119284	0.0572656	0.0352924	0.026726	66.9993	416517	128	7	28	73598	8991.61	168.51	1009.5	62395	19182.6	12.9	92916	0.603119	0.212271	246400
广 东	Guang dong	19	2022	0.190506	0.974982	0.289521	0.370524	0.314937	7.73272	1741400	587	20	38	101905	18533.1	267.09	12257.5	2540672	52843.5	52.4	837276	0.747808	0.139108	2414100
广 西	Guang xi	20	2022	-0.347911	0.0458268	0.0126181	0.0160858	0.0171229	8.76207	85360	30	2	12	52164	5893.32	140.75	710.1	340	8938.6	9.1	44691	0.556568	0.266462	970700
重 庆	Chong qing	21	2022	0.392863	0.075563	0.0403259	0.0155621	0.0196749	12.1012	266274	109	2	29	90663	4892.77	106.61	1254.9	31833	11693.9	8.4	66467	0.709617	0.226097	156000
四 川	Si chuan	22	2022	-0.155328	0.147394	0.0319631	0.0670067	0.0484241	12.6535	336548	117	5	7	67777	11914.7	205.15	804.8	149202	21157.1	24.5	135507	0.583473	0.339348	268200
贵 州	Gui zhou	23	2022	-0.380791	0.00736623	0.00356887	0.000950107	0.00284725	12.3523	12095	34	0	5	52321	5851.36	89.47	179.1	895	7113	5.3	29382	0.548237	0.808621	214700
云 南	Yun nan	24	2022	-0.282733	0.0197914	0.00613453	0.00541609	0.00824074	3.21028	34467	60	2	8	61716	6699.79	110.03	785.4	0	10471.2	9.3	39497	0.517153	0.551507	236900
陕 西	Shan xi	25	2022	-0.0664141	0.241194	0.0463347	0.137708	0.0571519	3.32838	356749	311	16	49	82864	6760.98	130.44	937.6	72642	15933.1	13.4	79375	0.64004	0.531951	200500
甘 肃	Gan su	26	2022	0.542624	0.0668836	0.00217509	0.0579511	0.0067574	3.38206	29982	5	0	0	44968	4257.16	64.81	70	519	3945	7.9	22490	0.542135	0.801182	41000
青 海	Qing hai	27	2022	0.281332	0.0187252	0.00800917	0.00445259	0.0062634	8.17064	41396	25	0	5	60724	1975.1	8.09	26.5	89	1585.7	1.9	5276	0.615126	0.587727	10800
新 疆	Xin jiang	28	2022	-0.00754052	0.0178271	0.00274432	0.00678639	0.00829643	7.85927	21588	14	5	4	68552	6835.4	61.14	1954.5	279	7271.1	6.8	20528	0.579049	0.472229	61600
