# Supplementary material
Source: Research Square preprint supplement (doi:10.21203/rs.3.rs-8940480/v1)
Supplement: Supplementary file 4 [file d59d7f3092aeca92263d3323.xlsx]

## Sheet: Sheet1
创新型产业集群	Innovative industrial cluster	id	year	Digital technology	Fundamentals of Digital Technology	Application of Digital Technology	Digital technology innovation
北 京	Bei jing	1	2018	0.104579	0.0285455	0.0295895	0.0464444
天 津	Tian jin	2	2018	0.0397083	0.0129114	0.0107	0.0160969
河 北	He bei	3	2018	0.0655591	0.0262522	0.0231163	0.0161906
山 西	Shan xi	4	2018	0.0176606	0.00398638	0.0110162	0.00265804
内蒙古	Nei meng gu	5	2018	0.0141172	0.00256781	0.00728373	0.00426568
辽 宁	Liao ning	6	2018	0.106811	0.029236	0.0522605	0.0253147
吉 林	Ji lin	7	2018	0.0482424	0.00972563	0.0132716	0.0252451
黑龙江	Hei long jiang	8	2018	0.0213639	0.00425497	0.0146172	0.00249179
上 海	Shang hai	9	2018	0.119452	0.0341099	0.0580281	0.027314
江 苏	Jiang su	10	2018	0.124506	0.0477619	0.026048	0.0506962
浙 江	Zhe jiang	11	2018	0.0967061	0.0375322	0.0291647	0.0300092
安 徽	An hui	12	2018	0.0550414	0.0213581	0.00854211	0.0251411
福 建	Fu jian	13	2018	0.0485882	0.025804	0.0102389	0.0125453
江 西	Jiang xi	14	2018	0.0305023	0.0117097	0.00523536	0.0135572
山 东	Shan dong	15	2018	0.116739	0.0449017	0.0221518	0.0496859
河 南	He nan	16	2018	0.0172719	0.00607483	9.23436e-05	0.0111048
湖 北	Hu bei	17	2018	0.0551984	0.0207508	0.0214311	0.0130166
湖 南	Hu nan	18	2018	0.0620624	0.0266118	0.0151383	0.0203123
广 东	Guang dong	19	2018	0.331138	0.115122	0.0995053	0.116511
广 西	Guang xi	20	2018	0.0330897	0.0126682	0.00912731	0.0112942
重 庆	Chong qing	21	2018	0.0289717	0.0111909	0.0123167	0.00546414
四 川	Si chuan	22	2018	0.0667808	0.0214409	0.0179506	0.0273893
贵 州	Gui zhou	23	2018	0.00674055	0.0023836	0.00027185	0.0040851
云 南	Yun nan	24	2018	0.0115716	0.00190399	0.00635353	0.00331411
陕 西	Shan xi	25	2018	0.0833277	0.0280259	0.0182773	0.0370245
甘 肃	Gan su	26	2018	0.00643131	0.000466522	0.00161819	0.0043466
青 海	Qing hai	27	2018	0.0122219	0.0034976	0.0013314	0.00739285
新 疆	Xin jiang	28	2018	0.00919026	0.000328525	0.0041544	0.00470734
北 京	Bei jing	1	2019	0.114249	0.0282399	0.0344073	0.0516023
天 津	Tian jin	2	2019	0.0367875	0.0124739	0.00809365	0.0162199
河 北	He bei	3	2019	0.0693614	0.0276154	0.0226676	0.0190784
山 西	Shan xi	4	2019	0.0176387	0.00531391	0.00716603	0.00515876
内蒙古	Nei meng gu	5	2019	0.0149313	0.00274511	0.00791729	0.00426895
辽 宁	Liao ning	6	2019	0.118219	0.0304559	0.0617367	0.0260266
吉 林	Ji lin	7	2019	0.0478687	0.0115448	0.0153226	0.0210013
黑龙江	Hei long jiang	8	2019	0.0170055	0.00394745	0.0105892	0.0024689
上 海	Shang hai	9	2019	0.114343	0.0349926	0.0516696	0.0276813
江 苏	Jiang su	10	2019	0.142966	0.0529007	0.0326758	0.0573899
浙 江	Zhe jiang	11	2019	0.109159	0.0395878	0.0363365	0.0332351
安 徽	An hui	12	2019	0.0623091	0.0220564	0.0152019	0.0250508
福 建	Fu jian	13	2019	0.0433336	0.0170391	0.01264	0.0136545
江 西	Jiang xi	14	2019	0.0312488	0.0130269	0.00359825	0.0146237
山 东	Shan dong	15	2019	0.1259	0.0492545	0.0226874	0.0539582
河 南	He nan	16	2019	0.0175086	0.00631033	9.62708e-05	0.011102
湖 北	Hu bei	17	2019	0.0589523	0.0228151	0.0227895	0.0133477
湖 南	Hu nan	18	2019	0.0634452	0.0277145	0.0152938	0.020437
广 东	Guang dong	19	2019	0.403004	0.133254	0.128318	0.141431
广 西	Guang xi	20	2019	0.0311545	0.0125405	0.00716376	0.0114502
重 庆	Chong qing	21	2019	0.0347062	0.0142406	0.0134674	0.00699823
四 川	Si chuan	22	2019	0.0973398	0.024099	0.0414357	0.0318051
贵 州	Gui zhou	23	2019	0.00703042	0.00262891	0.000306249	0.00409526
云 南	Yun nan	24	2019	0.00676857	0.00202578	0.00129275	0.00345004
陕 西	Shan xi	25	2019	0.0835953	0.0307813	0.0142951	0.0385189
甘 肃	Gan su	26	2019	0.00630416	0.00042897	0.00147674	0.00439844
青 海	Qing hai	27	2019	0.00884774	0.00354572	0.00225145	0.00305057
新 疆	Xin jiang	28	2019	0.00495925	0.000308238	1.49137e-05	0.0046361
北 京	Bei jing	1	2020	0.12471	0.0335055	0.0325132	0.0586911
天 津	Tian jin	2	2020	0.0620693	0.0158715	0.0244437	0.0217542
河 北	He bei	3	2020	0.0736606	0.0285651	0.0231645	0.021931
山 西	Shan xi	4	2020	0.0143596	0.0051968	0.00394605	0.00521678
内蒙古	Nei meng gu	5	2020	0.0151691	0.00233568	0.00855131	0.00428215
辽 宁	Liao ning	6	2020	0.146121	0.0411236	0.0772063	0.0277914
吉 林	Ji lin	7	2020	0.0362169	0.0103097	0.0142855	0.0116216
黑龙江	Hei long jiang	8	2020	0.0130684	0.00425369	0.00463662	0.00417806
上 海	Shang hai	9	2020	0.105092	0.0271731	0.0526258	0.0252925
江 苏	Jiang su	10	2020	0.151356	0.0565405	0.0304534	0.0643626
浙 江	Zhe jiang	11	2020	0.212562	0.041442	0.133631	0.0374885
安 徽	An hui	12	2020	0.0603425	0.0236337	0.0152606	0.0214482
福 建	Fu jian	13	2020	0.0465155	0.0200433	0.0133842	0.013088
江 西	Jiang xi	14	2020	0.0337833	0.012901	0.00595135	0.0149309
山 东	Shan dong	15	2020	0.109139	0.0525256	0.0163213	0.040292
河 南	He nan	16	2020	0.0299665	0.0077645	0.00396985	0.0182321
湖 北	Hu bei	17	2020	0.0660501	0.0214817	0.028773	0.0157953
湖 南	Hu nan	18	2020	0.0670881	0.02916	0.017132	0.020796
广 东	Guang dong	19	2020	0.485437	0.155695	0.16238	0.167362
广 西	Guang xi	20	2020	0.03893	0.0131187	0.0119088	0.0139024
重 庆	Chong qing	21	2020	0.0236475	0.015179	0.00243654	0.00603193
四 川	Si chuan	22	2020	0.110476	0.025661	0.0486341	0.0361807
贵 州	Gui zhou	23	2020	0.00859385	0.00287998	0.00031478	0.00539909
云 南	Yun nan	24	2020	0.0106776	0.00268795	0.00416212	0.00382751
陕 西	Shan xi	25	2020	0.139107	0.0326191	0.0690843	0.0374036
甘 肃	Gan su	26	2020	0.00680996	0.000509497	0.000579378	0.00572108
青 海	Qing hai	27	2020	0.0106884	0.00388946	0.00232727	0.00447166
新 疆	Xin jiang	28	2020	0.00383318	0.000445251	1.65864e-05	0.00337134
北 京	Bei jing	1	2021	0.108785	0.0385255	0.0385798	0.0316799
天 津	Tian jin	2	2021	0.0658017	0.0289009	0.0183501	0.0185508
河 北	He bei	3	2021	0.0776285	0.0310676	0.0222009	0.02436
山 西	Shan xi	4	2021	0.0271802	0.00827731	0.00512873	0.0137741
内蒙古	Nei meng gu	5	2021	0.0157976	0.00242634	0.00918697	0.00418427
辽 宁	Liao ning	6	2021	0.163233	0.0485331	0.0852433	0.0294566
吉 林	Ji lin	7	2021	0.028652	0.0120489	0.0158749	0.000728135
黑龙江	Hei long jiang	8	2021	0.0118023	0.00417486	0.0041545	0.00347289
上 海	Shang hai	9	2021	0.143987	0.026824	0.0994528	0.0177104
江 苏	Jiang su	10	2021	0.195742	0.0726439	0.045346	0.0777522
浙 江	Zhe jiang	11	2021	0.141617	0.0492575	0.0470432	0.0453161
安 徽	An hui	12	2021	0.0564791	0.0258972	0.0143988	0.0161832
福 建	Fu jian	13	2021	0.057948	0.0228323	0.0145768	0.0205389
江 西	Jiang xi	14	2021	0.0429396	0.0176459	0.010534	0.0147597
山 东	Shan dong	15	2021	0.175748	0.0705238	0.0520869	0.0531375
河 南	He nan	16	2021	0.0562401	0.0148209	0.0175677	0.0238515
湖 北	Hu bei	17	2021	0.099971	0.0372991	0.039574	0.023098
湖 南	Hu nan	18	2021	0.0616481	0.0221859	0.0211877	0.0182745
广 东	Guang dong	19	2021	0.630243	0.183822	0.238656	0.207765
广 西	Guang xi	20	2021	0.0452814	0.0127934	0.0168902	0.0155978
重 庆	Chong qing	21	2021	0.0473823	0.0291229	0.0116581	0.00660136
四 川	Si chuan	22	2021	0.147327	0.0311083	0.0726466	0.0435719
贵 州	Gui zhou	23	2021	0.00951781	0.00342948	0.000675566	0.00541277
云 南	Yun nan	24	2021	0.0148489	0.00472894	0.00353445	0.00658555
陕 西	Shan xi	25	2021	0.141167	0.0357962	0.062712	0.0426588
甘 肃	Gan su	26	2021	0.00629493	0.000511527	0.000580401	0.005203
青 海	Qing hai	27	2021	0.00952914	0.00323065	0.0019094	0.00438908
新 疆	Xin jiang	28	2021	0.0138408	0.0020257	0.00475409	0.00706101
北 京	Bei jing	1	2022	0.115923	0.0382934	0.0453169	0.0323127
天 津	Tian jin	2	2022	0.114741	0.0368821	0.0429158	0.0349429
河 北	He bei	3	2022	0.121377	0.0513741	0.0359599	0.0340431
山 西	Shan xi	4	2022	0.0318237	0.00886396	0.00898337	0.0139764
内蒙古	Nei meng gu	5	2022	0.0157238	0.00232517	0.00918625	0.00421241
辽 宁	Liao ning	6	2022	0.216863	0.0788081	0.0984947	0.0395601
吉 林	Ji lin	7	2022	0.0543938	0.015566	0.0138011	0.0250267
黑龙江	Hei long jiang	8	2022	0.0264755	0.00899363	0.007784	0.00969784
上 海	Shang hai	9	2022	0.120858	0.0442686	0.0449102	0.0316789
江 苏	Jiang su	10	2022	0.319487	0.114573	0.0725392	0.132375
浙 江	Zhe jiang	11	2022	0.252744	0.0718546	0.102252	0.0786373
安 徽	An hui	12	2022	0.110964	0.0323479	0.0422068	0.0364095
福 建	Fu jian	13	2022	0.0645715	0.0225176	0.0201258	0.0219281
江 西	Jiang xi	14	2022	0.0786478	0.0292145	0.0173217	0.0321116
山 东	Shan dong	15	2022	0.215472	0.0727639	0.0773945	0.0653132
河 南	He nan	16	2022	0.0856802	0.0278124	0.0263129	0.0315549
湖 北	Hu bei	17	2022	0.204056	0.0737028	0.0687393	0.0616138
湖 南	Hu nan	18	2022	0.119284	0.0572656	0.0352924	0.026726
广 东	Guang dong	19	2022	0.974982	0.289521	0.370524	0.314937
广 西	Guang xi	20	2022	0.0458268	0.0126181	0.0160858	0.0171229
重 庆	Chong qing	21	2022	0.075563	0.0403259	0.0155621	0.0196749
四 川	Si chuan	22	2022	0.147394	0.0319631	0.0670067	0.0484241
贵 州	Gui zhou	23	2022	0.00736623	0.00356887	0.000950107	0.00284725
云 南	Yun nan	24	2022	0.0197914	0.00613453	0.00541609	0.00824074
陕 西	Shan xi	25	2022	0.241194	0.0463347	0.137708	0.0571519
甘 肃	Gan su	26	2022	0.0668836	0.00217509	0.0579511	0.0067574
青 海	Qing hai	27	2022	0.0187252	0.00800917	0.00445259	0.0062634
新 疆	Xin jiang	28	2022	0.0178271	0.00274432	0.00678639	0.00829643
